# Supplementary material
Source: Springer Nature journal article supplement (https://www.springermedizin.de/resource/supplementary/12961_2010_195_MOESM3_ESM.pdf/9571630)
Supplement: MOESM3 [file 9571630]

Supplier: Novartis

*Negotiate with USAID/PMI and WHO on procurement.*

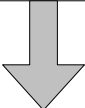

Importer: Pyramid Pharma

*Responsible for port clearance, storage, insurance and distribution to regions.*

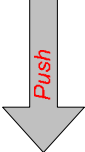

Regional Distributors

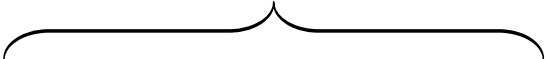

Southern Highland Pharmacy  
[Ruvuma region]

Marahaba Pharmaceuticals  
[Morogoro region]

*Purchase ACT from Pyramid, store and sale to ADDO. Record keeping and reports to Pyramid*

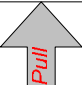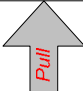

ADDOs

ADDOs

*Purchase from regional distributors, store, sale and provide advice to patients, record keeping and send reports to district malaria focal person and distributor.*

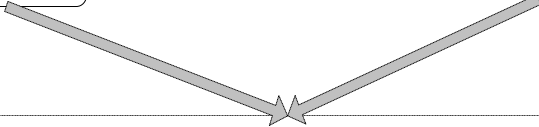

Patients
